# Supplementary material for: (E)-6-Hydroxy-2-Oxo-2H-Chromen-7-Yl 3-(4-Hydroxy-3-Methoxyphenyl)acrylate
Source: Preprints.org preprint supplement (doi:10.20944/preprints202305.0589.v1), 2023-05-09

## Supplementary Materials

### **(E)-6-Hydroxy-2-oxo-2H-chromen-7-yl 3-(4-hydroxy-3-methoxyphenyl)acrylate**

Yang-Heon Song\*

Department of Chemistry, Mokwon University, Daejeon 35349, Republic of Korea;

\*Correspondence: yhsong@mokwon.ac.kr; Tel.: +82-42-829-7562

**Figure S1.**  $^1\text{H}$  NMR spectrum of compound 4.

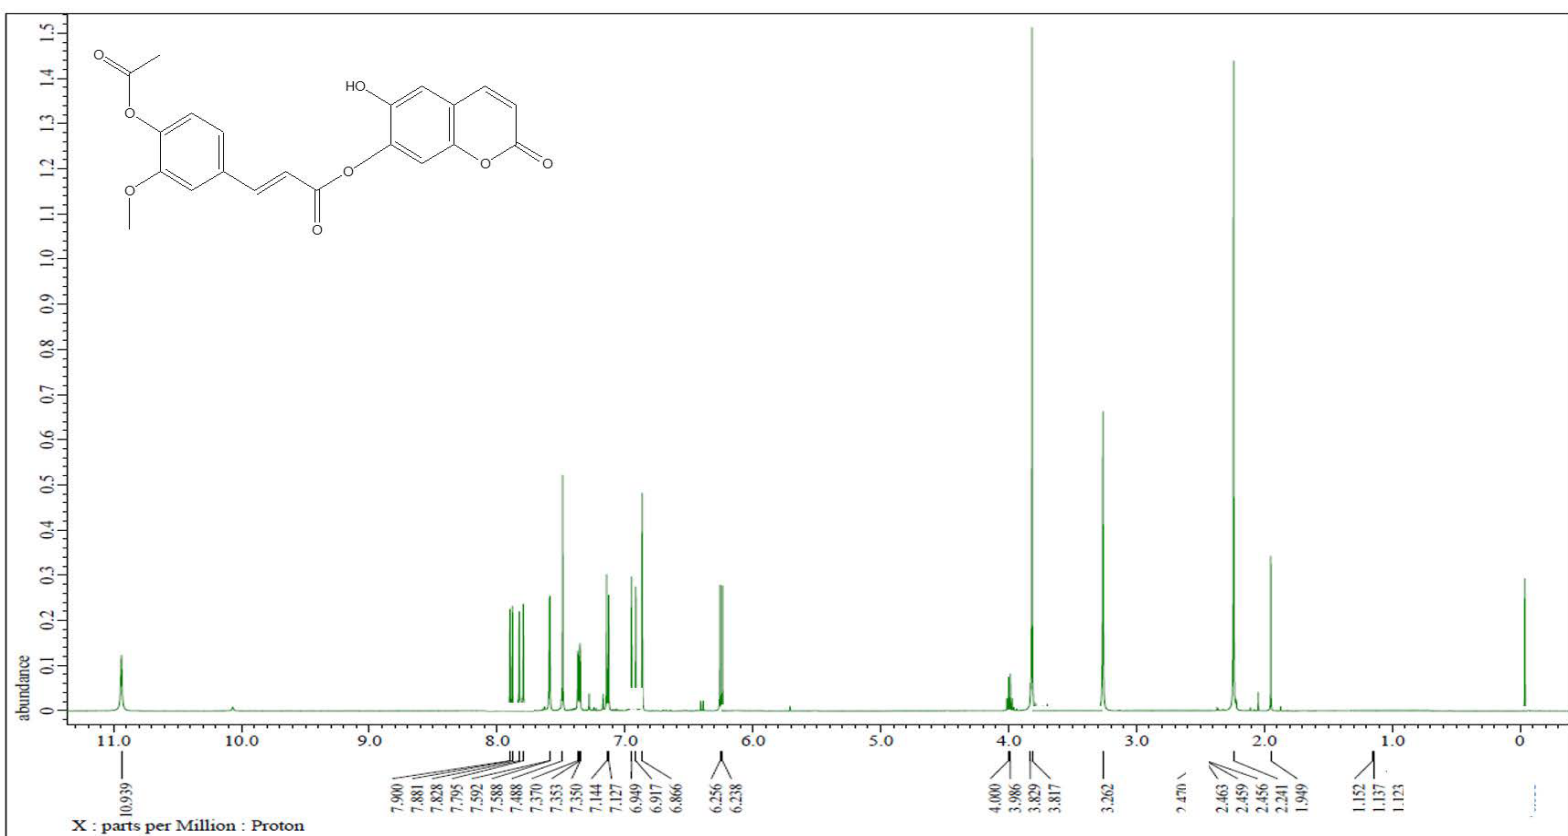

**Figure S2.**  $^{13}\text{C}$  NMR spectrum of compound 4.

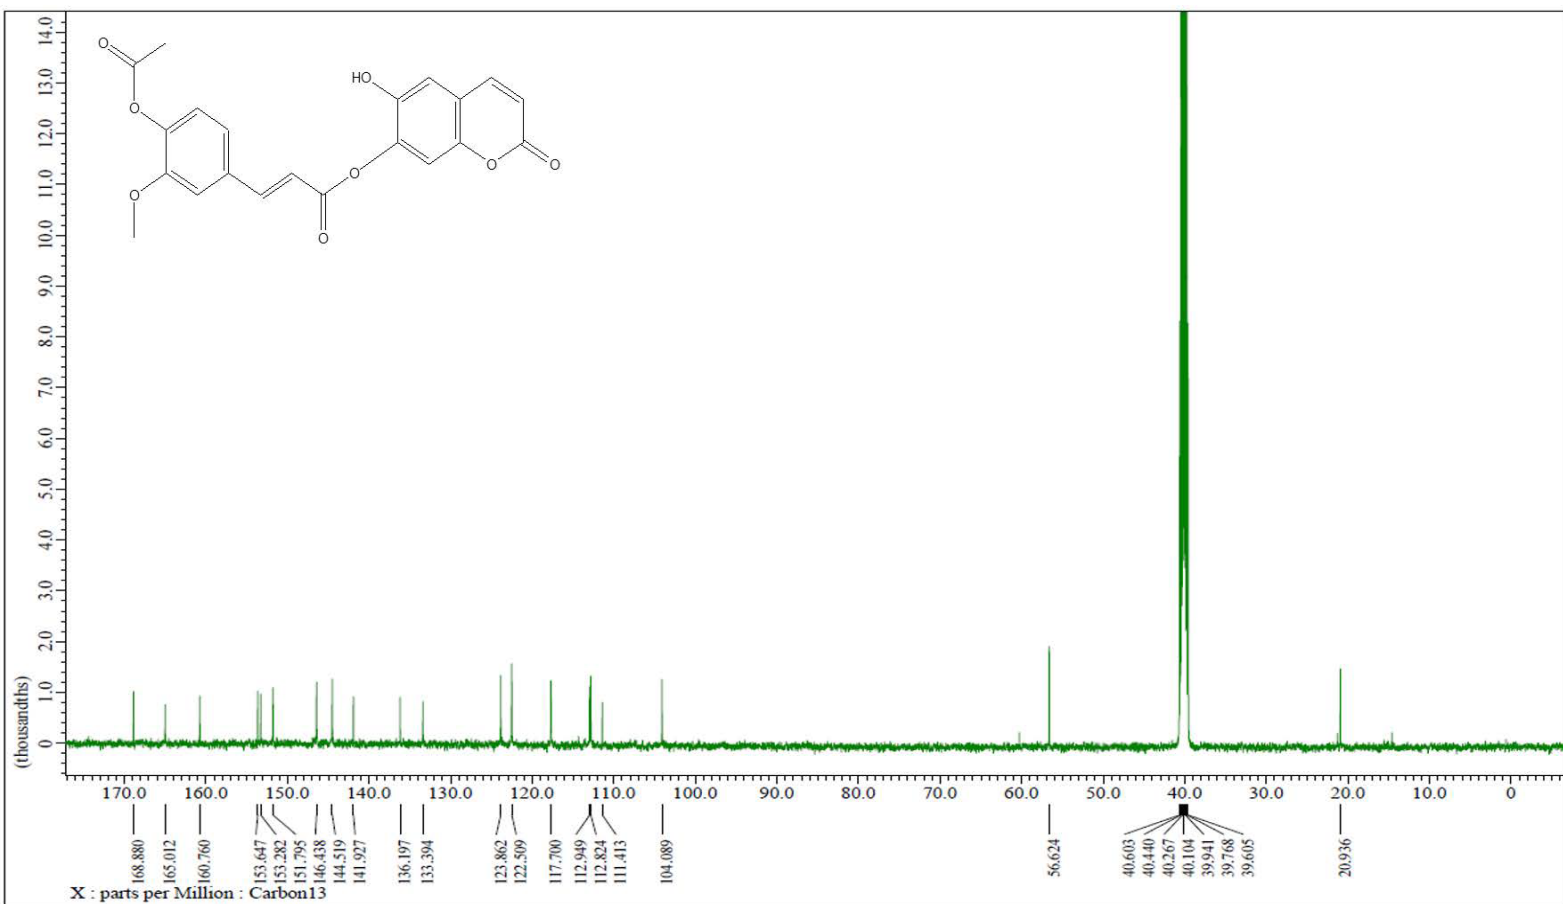

**Figure S3.** Mass spectrum of compound 4.

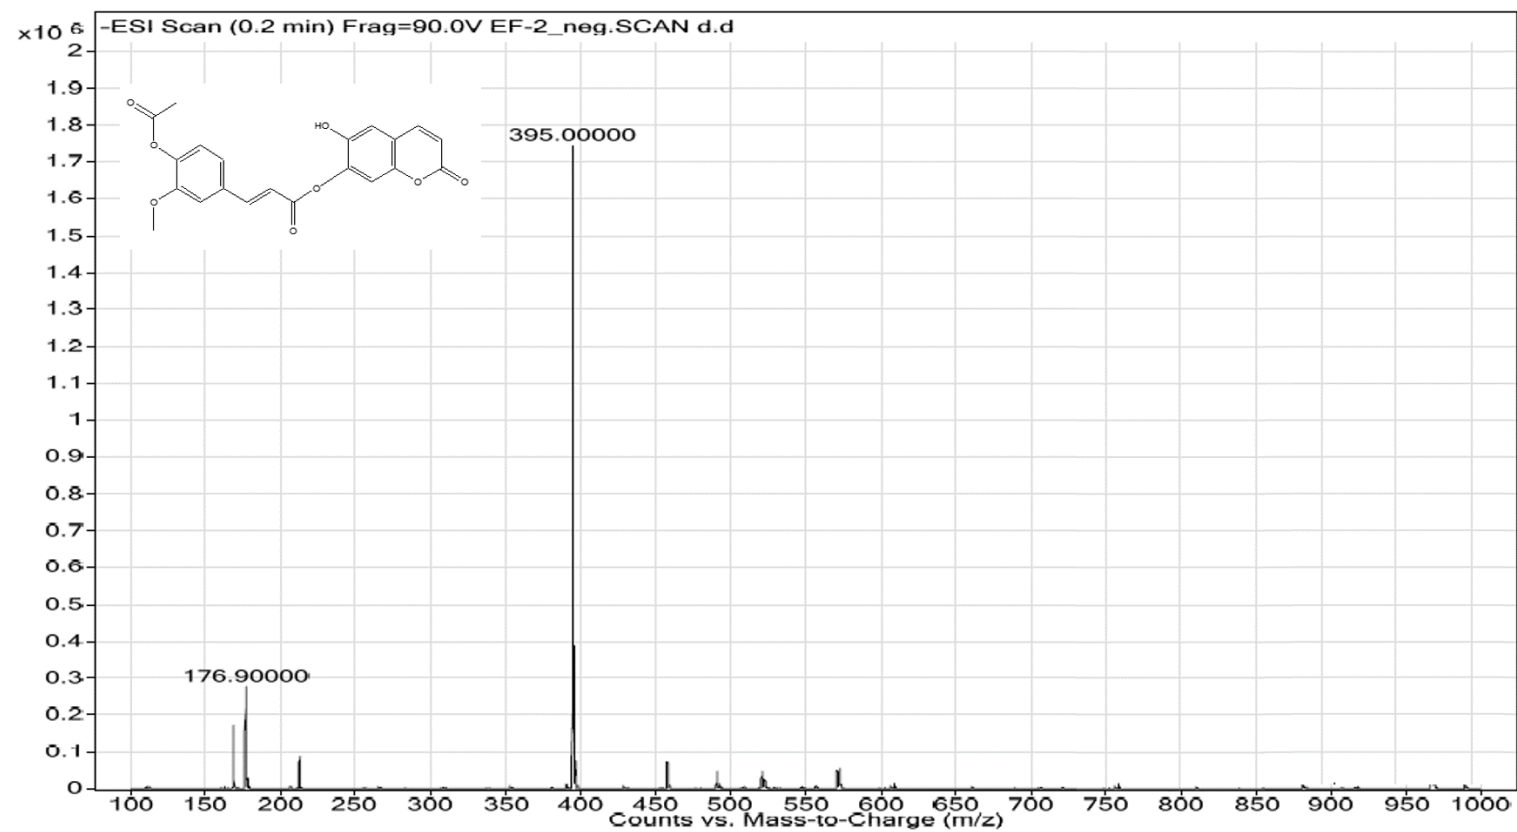

**Figure S4.**  $^1\text{H}$  NMR spectrum of compound 5.

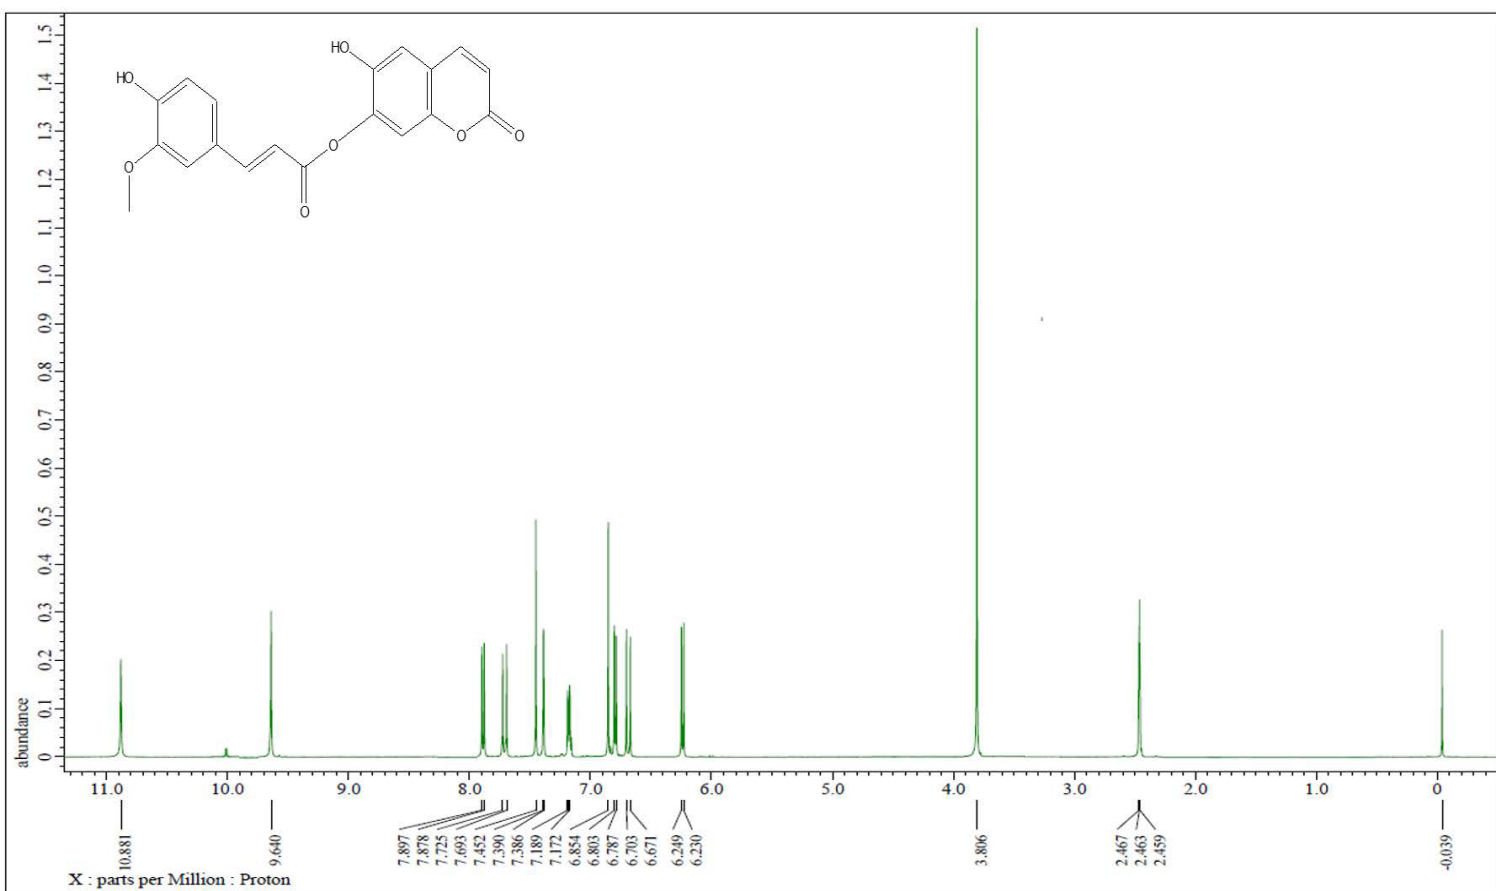

**Figure S5.**  $^{13}\text{C}$  NMR spectrum of compound 5.

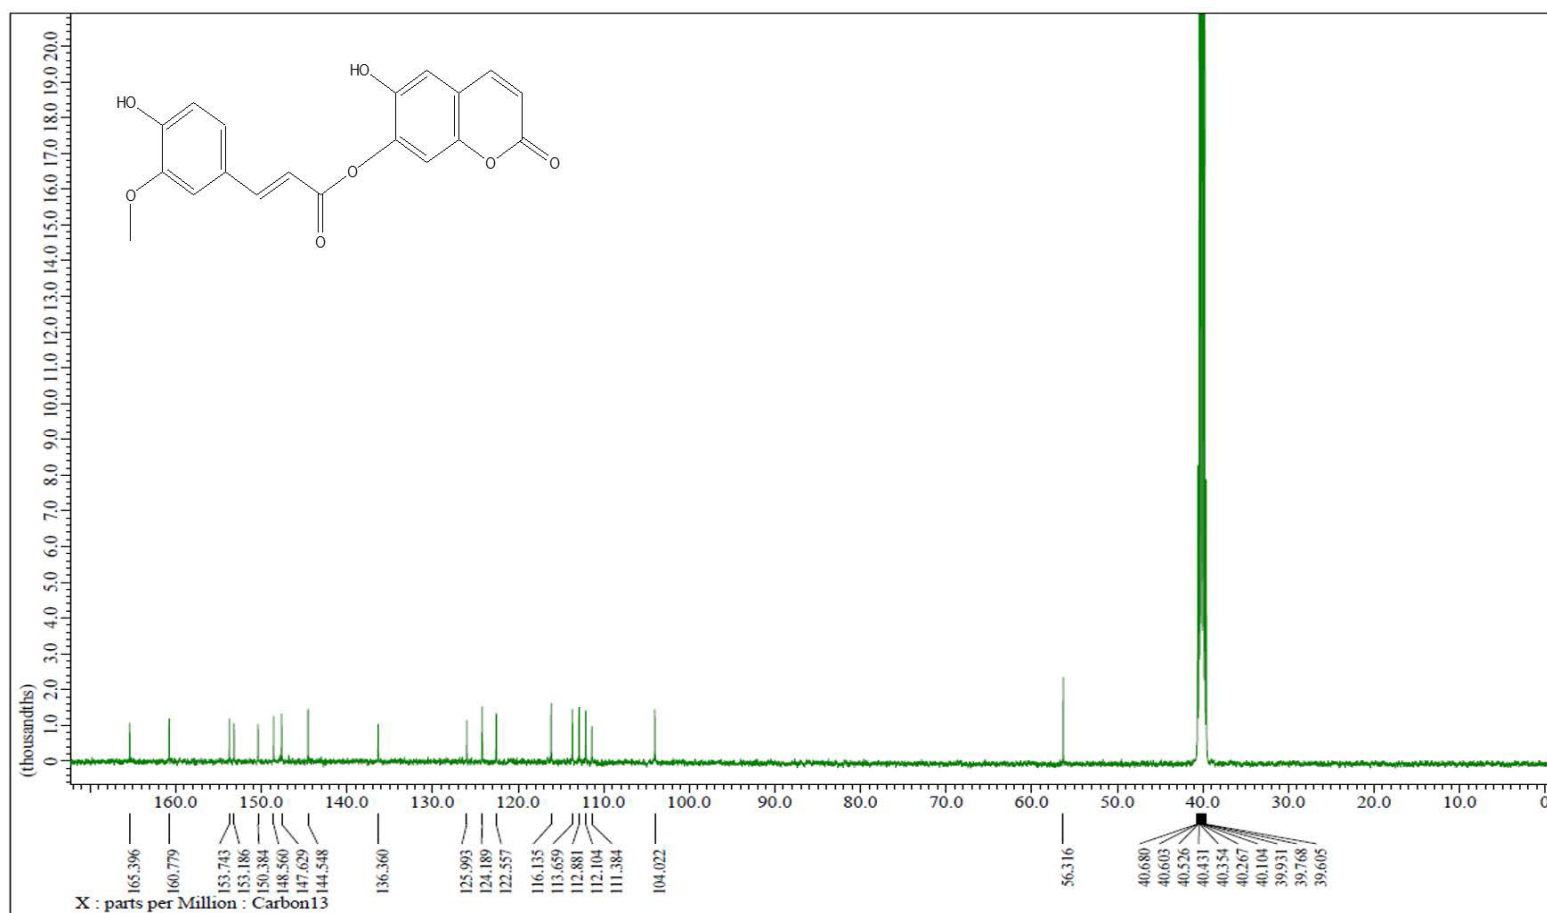

Figure S6. Mass spectrum of compound 5.

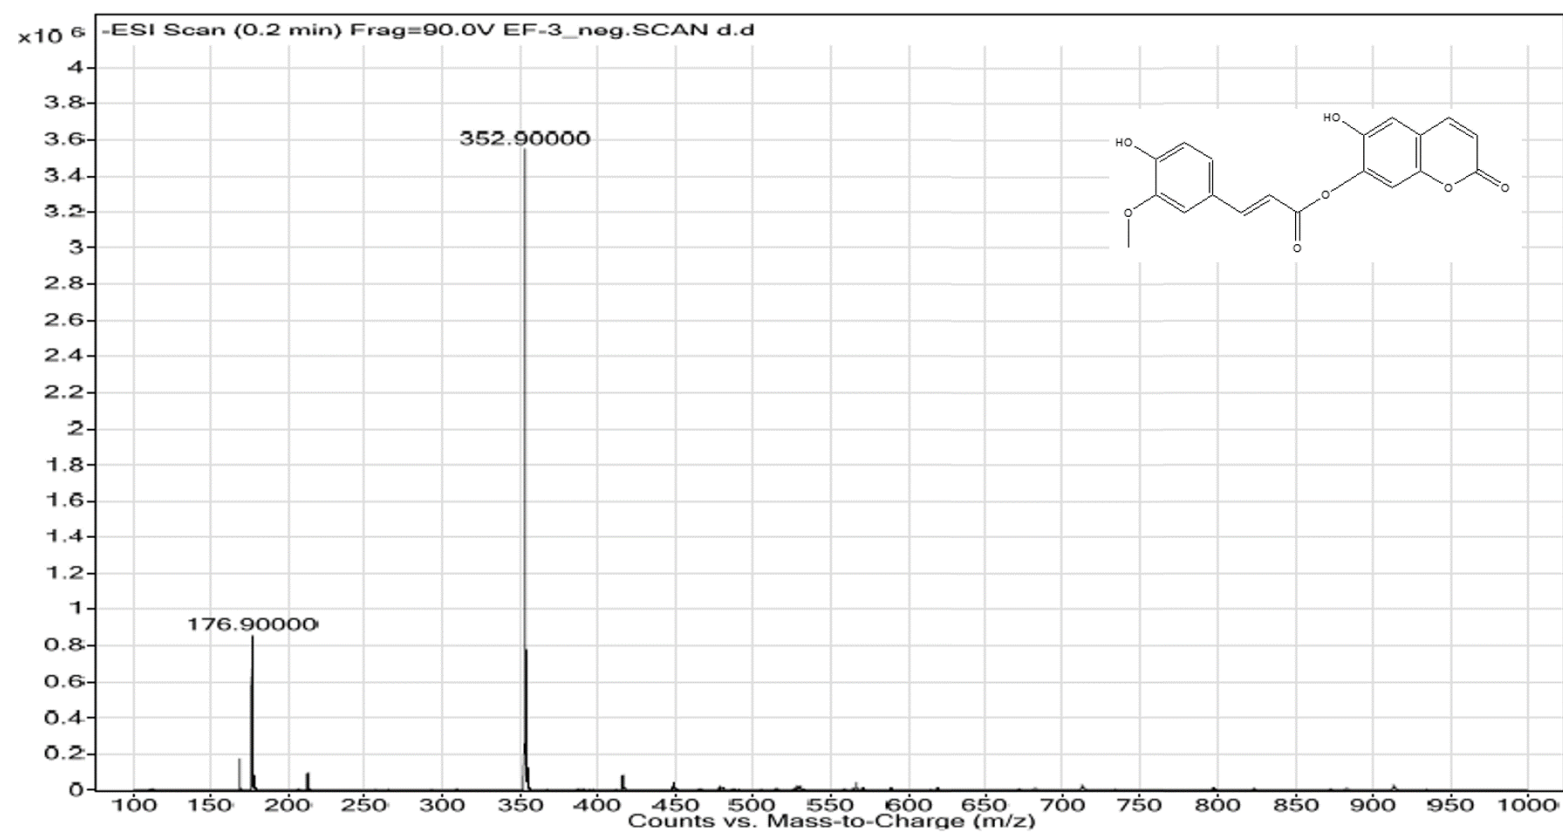

Supplement: Supplementary file 1 [file supplementary]
